# Supplementary material for: A further study of acetylacetone nitrosation
Source: Royal Society of Chemistry journal article supplement (doi:10.1039/c2ob26073e), 2013-01-01
Supplement: c2ob26073e.pdf [file c2ob26073e.pdf]

## A further study of acetylacetone nitrosation

Emilia Iglesias\* and Isabel Brandariz

Department of Química Física e E. Q. I. Facultad de Ciencias. Universidad de La Coruña. 15071-La Coruña, SPAIN. E-mail: emilia.iglesias@udc.es

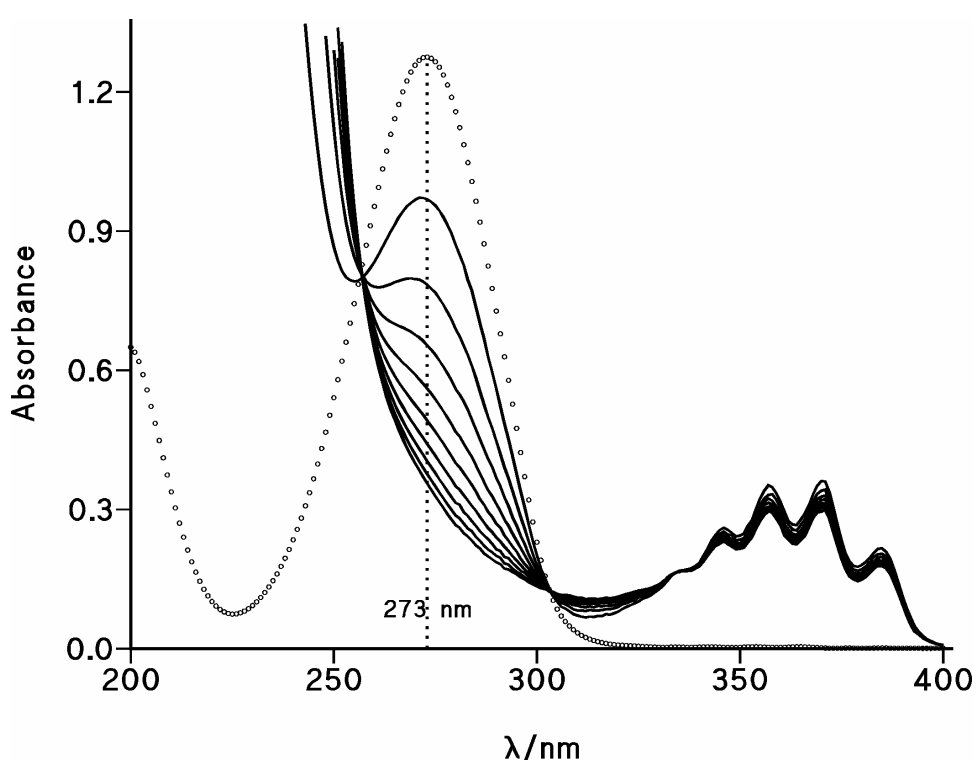

**Figure S1.** Reaction spectra (scans at 2 min interval) for the nitrosation of AcAc at  $[\text{nit}]=6.5$  mM,  $[\text{AcAc}]=0.68$  mM, and  $[\text{H}^+]=0.10$  M ( $\text{HClO}_4$ ) showing the decreasing absorption due to the enol consumption at 273 nm, and the  $\text{HNO}_2$ -system band between 300–400 nm. (o)AcAc spectrum recorded in the absence of nit under the same experimental conditions of the reaction.

**Table S1.** The pseudo first-order rate constants measured in the nitrosation of AcAc as a function of the buffer monochloroacético-monochloroacetato concentration; [AcAc]=0.2 mM, [nit]=5.8 mM and I=0.34 M (NaClO<sub>4</sub>)

| [buffer]/M | pH   | $k_{\text{obs}}/10^{-4}\text{s}^{-1}$ | [buffer]/M | pH   | $k_{\text{obs}}/10^{-4}\text{s}^{-1}$ | [buffer]/M | pH   | $k_{\text{obs}}/10^{-4}\text{s}^{-1}$ |
|------------|------|---------------------------------------|------------|------|---------------------------------------|------------|------|---------------------------------------|
| 0,60       | 2,57 | 2,71                                  | 0,57       | 2,79 | 2,16                                  | 0,60       | 2,66 | 2,61                                  |
| 0,53       | 2,57 | 2,66                                  | 0,52       | 2,78 | 2,16                                  | 0,53       | 2,65 | 2,60                                  |
| 0,47       | 2,56 | 2,61                                  | 0,47       | 2,77 | 2,14                                  | 0,47       | 2,65 | 2,51                                  |
| 0,40       | 2,56 | 2,52                                  | 0,40       | 2,78 | 2,03                                  | 0,40       | 2,65 | 2,48                                  |
| 0,33       | 2,56 | 2,50                                  | 0,33       | 2,77 | 2,03                                  | 0,33       | 2,65 | 2,37                                  |
| 0,27       | 2,56 | 2,41                                  | 0,27       | 2,73 | 2,17                                  | 0,27       | 2,66 | 2,23                                  |
| 0,20       | 2,56 | 2,24                                  | 0,20       | 2,72 | 2,11                                  | 0,20       | 2,66 | 2,15                                  |
| 0,17       | 2,56 | 2,23                                  | 0,13       | 2,73 | 2,03                                  | 0,13       | 2,66 | 2,07                                  |
| 0,13       | 2,56 | 2,15                                  | 0,10       | 2,73 | 1,98                                  | 0,067      | 2,68 | 1,90                                  |

**Table S2.** The pseudo first-order rate constants measured in the nitrosation of AcAc as a function of the buffer concentration at the indicated experimental conditions.

| Buffer dichloroacetic/dichloroacetate;<br>[AcAc]=0.21 mM; [nit]=6.67 mM; I=0.35 M |      |                                       | Buffer trichloroacetic / trichloroacetate;<br>[AcAc]=0.21 mM; [nit]=6.67 mM; I=0.50 M |                     |                                       |
|-----------------------------------------------------------------------------------|------|---------------------------------------|---------------------------------------------------------------------------------------|---------------------|---------------------------------------|
| [buffer]/M                                                                        | pH   | $k_{\text{obs}}/10^{-3}\text{s}^{-1}$ | [buffer]/M                                                                            | [H <sup>+</sup> ]/M | $k_{\text{obs}}/10^{-3}\text{s}^{-1}$ |
| 0.54                                                                              | 1.46 | 1.65                                  | 0.53                                                                                  | 0.37                | 6.65                                  |
| 0.54                                                                              | 1.30 | 2.135                                 | 0.53                                                                                  | 0.22                | 5.44                                  |
| 0.54                                                                              | 1.14 | 2.71                                  | 0.50                                                                                  | 0.31                | 5.77                                  |
| 0.47                                                                              | 1.27 | 2.09                                  | 0.50                                                                                  | 0.20                | 4.75                                  |
| 0.40                                                                              | 1.30 | 1.96                                  | 0.50                                                                                  | 0.11                | 3.67                                  |
| 0.33                                                                              | 1.33 | 1.79                                  | 0.42                                                                                  | 0.11                | 3.31                                  |

**Table S3.** The pseudo first-order rate constants measured in the nitrosation of AcAc as a function of the perchloric acid concentration at the indicated experimental conditions.

| I variable; [AcAc]=0.27 mM; [nit]=8.33 mM |                                       |                                                        | I=0.30 M; [AcAc]=0.21 mM; [nit]=6.67 mM |                                       |                                                        |
|-------------------------------------------|---------------------------------------|--------------------------------------------------------|-----------------------------------------|---------------------------------------|--------------------------------------------------------|
| [H <sup>+</sup> ]/M                       | $k_{\text{obs}}/10^{-3}\text{s}^{-1}$ | $k_{\text{o}}/\text{mol}^{-1}\text{dm}^3\text{s}^{-1}$ | [H <sup>+</sup> ]/M                     | $k_{\text{obs}}/10^{-3}\text{s}^{-1}$ | $k_{\text{o}}/\text{mol}^{-1}\text{dm}^3\text{s}^{-1}$ |
| 0.217                                     | 5.41                                  | 0.649                                                  | 0.217                                   | 4.89                                  | 0.733                                                  |
| 0.183                                     | 4.79                                  | 0.575                                                  | 0.183                                   | 4.52                                  | 0.678                                                  |
| 0.150                                     | 4.125                                 | 0.495                                                  | 0.150                                   | 3.905                                 | 0.585                                                  |
| 0.117                                     | 3.44                                  | 0.413                                                  | 0.117                                   | 3.25                                  | 0.487                                                  |
| 0.100                                     | 3.00                                  | 0.360                                                  | 0.100                                   | 2.91                                  | 0.436                                                  |
| 0.083                                     | 2.54                                  | 0.305                                                  | 0.083                                   | 2.51                                  | 0.376                                                  |
| 0.067                                     | 2.13                                  | 0.256                                                  | 0.067                                   | 2.06                                  | 0.309                                                  |
| 0.050                                     | 1.55                                  | 0.186                                                  | 0.050                                   | 1.56                                  | 0.234                                                  |
| 0.033                                     | 1.045                                 | 0.125                                                  | 0.033                                   | 1.09                                  | 0.163                                                  |
| 0.025                                     | 0.764                                 | 0.092                                                  | 0.025                                   | 0.82                                  | 0.123                                                  |
| 0.017                                     | 0.523                                 | 0.063                                                  | 0.017                                   | 0.55                                  | 0.0825                                                 |
